# Supplementary material
Source: Springer Nature journal article supplement (https://www.springermedizin.de/resource/supplementary/13012_2013_672_MOESM6_ESM.pdf/9630488)
Supplement: MOESM6 [file 9630488]

| Outcomes/confounders                                                     | Age           | Sex | Age      | Special interest in dementia | No. of years since graduated from medical school | Baseline period: cognitive assessment using MMSE | Baseline period: depression assessment using validated scale | Baseline period: reported suspicion of cognitive impairment | Baseline self-report of adherence to recommended behaviour | Baseline intention to adhere to recommended behaviour | Baseline behavioural constructs for primary outcome | Practice nurse involved in health assessments for people aged ≥75 years | Practice provides services for residential care facilities | No. practitioners per practice* | Geographic location of the practice* |
|--------------------------------------------------------------------------|---------------|-----|----------|------------------------------|--------------------------------------------------|--------------------------------------------------|--------------------------------------------------------------|-------------------------------------------------------------|------------------------------------------------------------|-------------------------------------------------------|-----------------------------------------------------|-------------------------------------------------------------------------|------------------------------------------------------------|---------------------------------|--------------------------------------|
| Level confounder measured at                                             | Patient level |     | GP level |                              |                                                  |                                                  |                                                              |                                                             |                                                            |                                                       |                                                     | Practice level                                                          |                                                            |                                 |                                      |
| GP behaviour                                                             |               |     |          |                              |                                                  |                                                  |                                                              |                                                             |                                                            |                                                       |                                                     |                                                                         |                                                            |                                 |                                      |
| Cognitive assessment using MMSE                                          | ✓             | ✓   | ✓        | ✓                            | ✓                                                | ✓                                                |                                                              |                                                             |                                                            |                                                       |                                                     | ✓                                                                       | ✓                                                          | ✓                               | ✓                                    |
| Depression assessment using validated scale                              | ✓             | ✓   | ✓        | ✓                            | ✓                                                |                                                  | ✓                                                            |                                                             |                                                            |                                                       |                                                     | ✓                                                                       | ✓                                                          | ✓                               | ✓                                    |
| Referral to CDAMS or specialist                                          | ✓             | ✓   | ✓        | ✓                            | ✓                                                |                                                  |                                                              |                                                             |                                                            |                                                       |                                                     |                                                                         | ✓                                                          | ✓                               | ✓                                    |
| Referral for CT scan                                                     | ✓             | ✓   | ✓        | ✓                            | ✓                                                |                                                  |                                                              |                                                             |                                                            |                                                       |                                                     |                                                                         | ✓                                                          | ✓                               | ✓                                    |
| Dementia diagnosis                                                       | ✓             | ✓   | ✓        | ✓                            | ✓                                                |                                                  |                                                              |                                                             |                                                            |                                                       |                                                     |                                                                         | ✓                                                          | ✓                               | ✓                                    |
| Cognitive assessment using MMSE (all patients aged 70+ years)            | ✓             | ✓   | ✓        | ✓                            | ✓                                                | ✓                                                |                                                              |                                                             |                                                            |                                                       |                                                     | ✓                                                                       | ✓                                                          | ✓                               | ✓                                    |
| Reported suspicion of cognitive impairment (all patients aged 70+ years) | ✓             | ✓   | ✓        | ✓                            | ✓                                                |                                                  |                                                              | ✓                                                           |                                                            |                                                       |                                                     | ✓                                                                       | ✓                                                          | ✓                               | ✓                                    |
| Dementia diagnosis (all patients aged 70+ years)                         | ✓             | ✓   | ✓        | ✓                            | ✓                                                |                                                  |                                                              | ✓                                                           |                                                            |                                                       |                                                     |                                                                         | ✓                                                          | ✓                               | ✓                                    |
| Proxy measures of GP behaviour                                           |               |     |          |                              |                                                  |                                                  |                                                              |                                                             |                                                            |                                                       |                                                     |                                                                         |                                                            |                                 |                                      |
| Self-report of adherence to recommended behaviour                        |               |     | ✓        | ✓                            | ✓                                                |                                                  |                                                              |                                                             | ✓                                                          |                                                       |                                                     |                                                                         |                                                            | ✓                               | ✓                                    |
| Behavioural simulation to adhere to recommended behaviour                |               |     | ✓        | ✓                            | ✓                                                |                                                  |                                                              |                                                             |                                                            |                                                       |                                                     |                                                                         |                                                            | ✓                               | ✓                                    |
| Hypothesised mediators of GP behaviour                                   |               |     |          |                              |                                                  |                                                  |                                                              |                                                             |                                                            |                                                       |                                                     |                                                                         |                                                            |                                 |                                      |
| Intention to adhere to recommended behaviour                             |               |     | ✓        | ✓                            | ✓                                                |                                                  |                                                              |                                                             |                                                            | ✓                                                     |                                                     |                                                                         |                                                            | ✓                               | ✓                                    |
| Behavioural construct for primary outcomes                               |               |     | ✓        | ✓                            |                                                  |                                                  |                                                              |                                                             |                                                            |                                                       | ✓                                                   |                                                                         |                                                            | ✓                               | ✓                                    |

\*Stratification variable.
